# Supplementary material for: Outcomes of Endovascular Therapy in Acute Basilar Artery Occlusion With Severe Symptoms
Source: PubMed Central journal article supplement (PMC8678675; doi:10.1001/jamanetworkopen.2021.39550), 2021-12-16
Supplement: jamanetwopen-e2139550-s001.pdf [file jamanetwopen-e2139550-s001.pdf]

## Supplemental Online Content

Kong W, Yuan J, Huang J, et al. Outcomes of endovascular therapy in acute basilar artery occlusion with severe symptoms. *JAMA Netw Open*. 2021;4(12):e2139550. doi:10.1001/jamanetworkopen.2021.39550

**eMethods 1.** Propensity Score Matching Analysis

**eMethods 2.** Missing or Incomplete Data

**eTable 1.** Clinical Outcomes of Patients with Severe Acute Basilar Artery Occlusion by Treatment

**eTable 2.** Multivariate Analysis of Estimators of Outcomes

**eTable 3.** Comparison of Patients With Favorable vs Poor Outcomes

**eTable 4.** Baseline Characteristics of Patients with Endovascular Therapy

**eTable 5.** Multivariate Analysis of Estimators of Outcomes After Endovascular Therapy

**eFigure 1.** Flowchart

**eFigure 2.** Association of Baseline National Institutes of Health Stroke Scale Score With Probability of Favorable Outcome

**eFigure 3.** Estimated Marginal Effects of Favorable Outcome Probabilities on Onset to Puncture (OTP) Time and Puncture to Recanalization (PTR) Time

**eFigure 4.** Association of Baseline National Institutes of Health Stroke Scale Score With Probability of Clinical Outcomes With Endovascular Therapy

This supplemental material has been provided by the authors to give readers additional information about their work.

## eMethods 1. Propensity Score Matching Analysis

We performed a 1:2 propensity score matching based on the nearest-neighbor matching algorithm with a caliper width of 0.2 of the propensity score with age, baseline NIHSS, baseline posterior circulation-Acute Stroke Prognosis Early CT Score (pc-ASPECTS), etiology, occlusion site, and IVT. Propensity score matching analysis were performed using the IBM SPSS Statistics 26 version (IBM Corp, Armonk, NY, USA). Six patients were excluded because of lack of baseline pc-ASPECTS score. The variables, parameter settings and results are listed as follows:

### PSMATCHING3

```
/VARS  
  TREAT = group  
  COVS = baseline NIHSS baseline ASPECTS Occlusion Site IVT  
  ADDLCOVS = age TOAST  
/MATCHIT  
  MATCH=NEAREST  
  EST =LOGIT  
  DISCARD = NONE  
  MORDER = LARGEST  
  RATIO = 2  
  CALIPER = .2  
/OPTIONS DETAILED BAL DETAILED BAL_CLUSTER  
/PLOT HISTBAL DOTPLOT INDBAL RESOLUTION = 300  
/OUTPUT PAIRED MATCHED_CASES_ONLY.
```

| Sample Sizes |         |         |         |         |           |         |           |         |
|--------------|---------|---------|---------|---------|-----------|---------|-----------|---------|
| Subsamples   | All     |         | Matched |         | Unmatched |         | Discarded |         |
|              | Control | Treated | Control | Treated | Control   | Treated | Control   | Treated |
| (all cases)  | 431     | 111     | 199     | 105     | 232       | 6       | 0         | 0       |

| Relative multivariate imbalance L1 (Iacus, King, & Porro, 2010) |                 |                |
|-----------------------------------------------------------------|-----------------|----------------|
|                                                                 | Before matching | After matching |
| (all cases)                                                     | .970            | .952           |

| Summary of unbalanced covariates ( $ d  > .25$ )         |
|----------------------------------------------------------|
| No covariate exhibits a large imbalance ( $ d  > .25$ ). |

R Graph

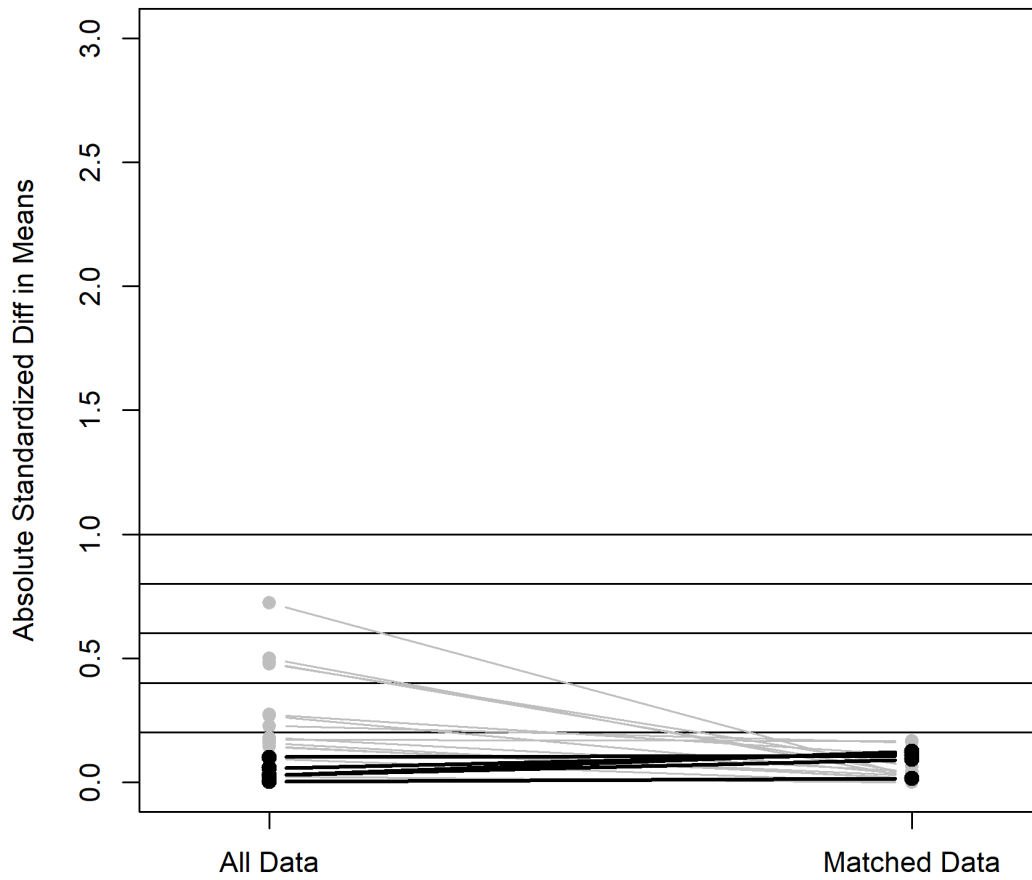

## Standardized differences before matching

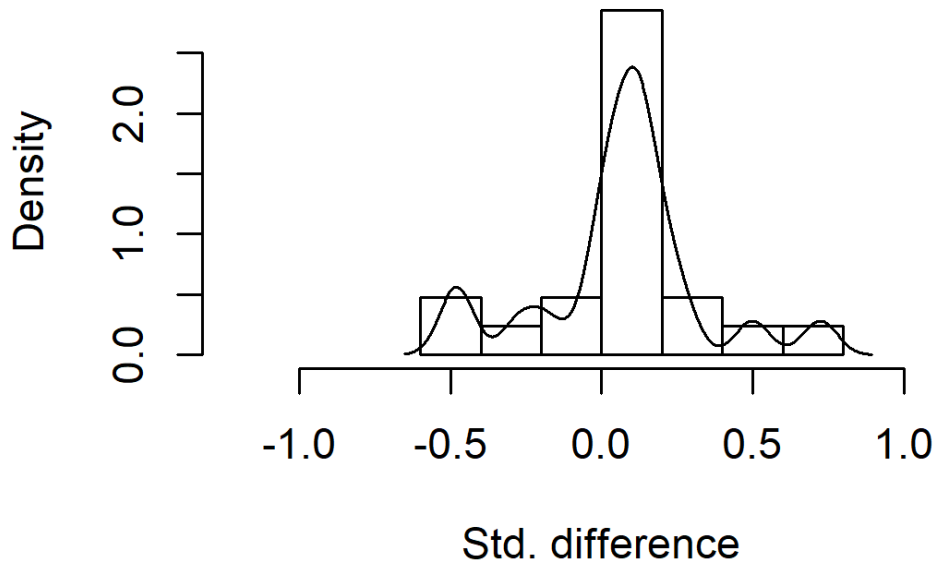

## Standardized differences after matching

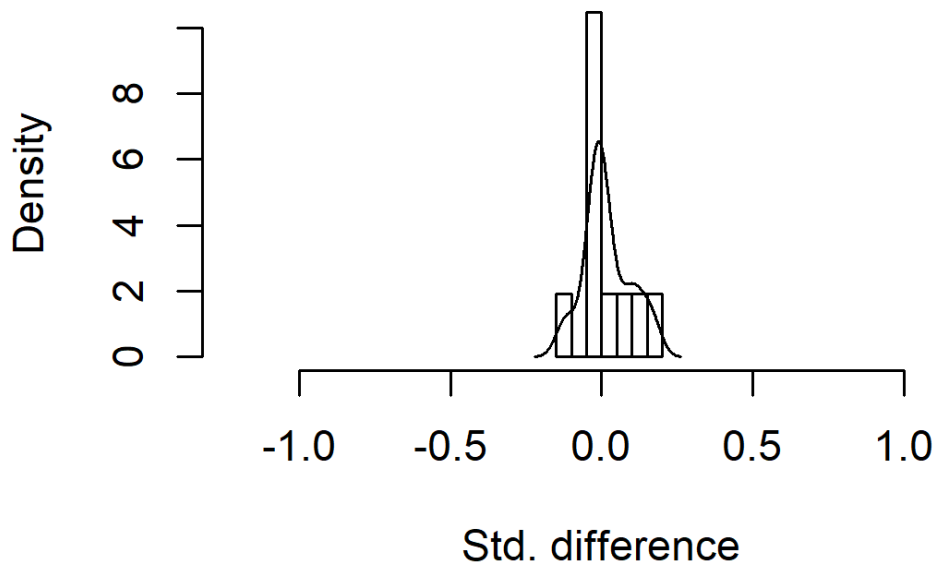

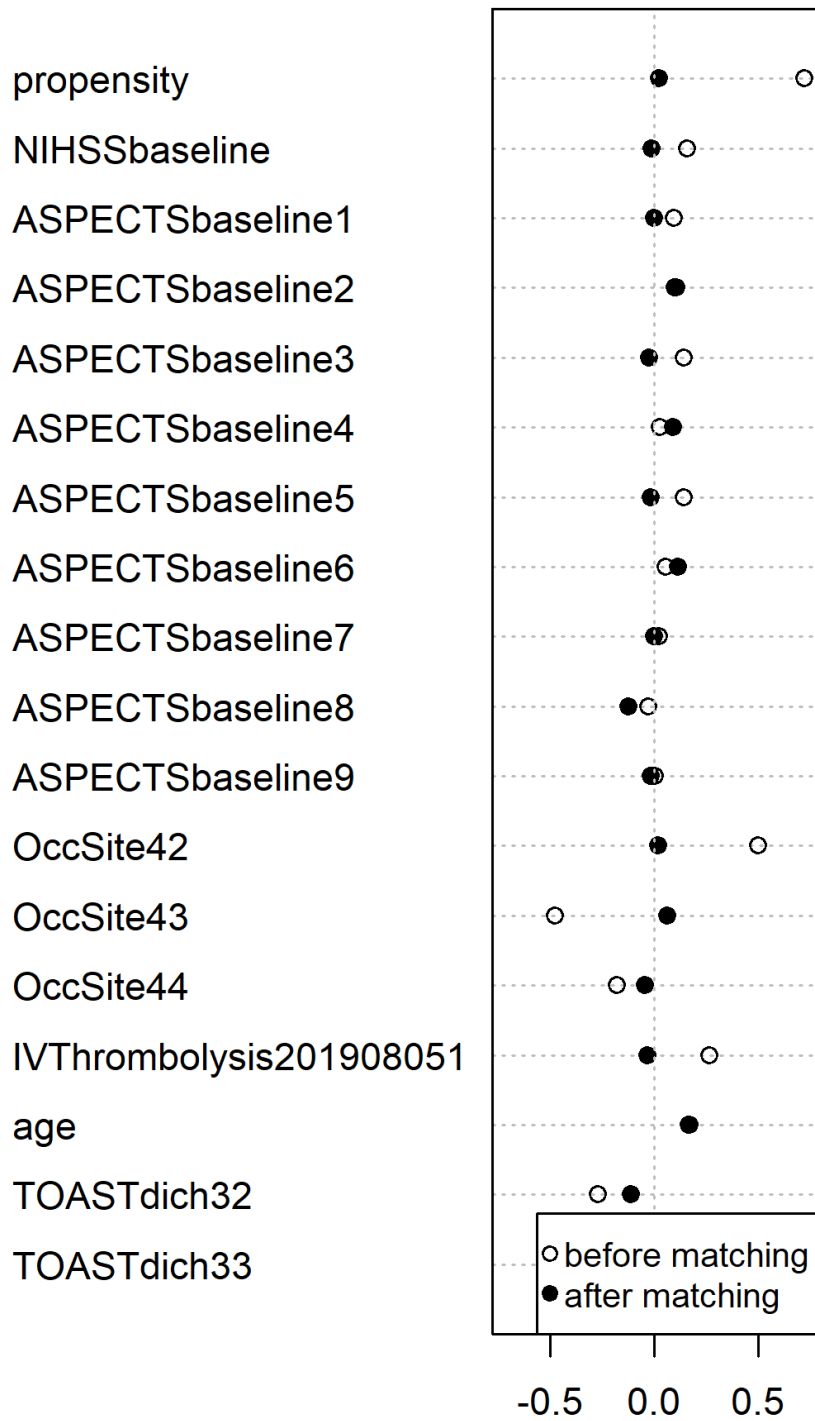

## **eMethods 2. Missing or Incomplete Data**

Among 542 patients, six patients had missing baseline posterior circulation-Acute Stroke Prognosis Early CT Score (pc-ASPECTS), seven patients missing body temperature and three patients missing systolic blood pressure (SBP) and diastolic blood pressure (DBP). We excluded the missing essential data from our analysis, so we didn't impute for missing data.

**eTable 1.** Clinical Outcomes of Patients with Severe Acute Basilar Artery Occlusion by Treatment

| Characteristic                    | Unmatched patients, No. (%) |                |                |                                  |            |                                      |            | Propensity score–matched patients, No. (%) |                |                |                     |
|-----------------------------------|-----------------------------|----------------|----------------|----------------------------------|------------|--------------------------------------|------------|--------------------------------------------|----------------|----------------|---------------------|
|                                   | All<br>(n=542)              | EVT<br>(n=431) | SMT<br>(n=111) | Unadjusted OR<br>(95% CI)        | P<br>Value | Adjusted OR<br>(95% CI) <sup>c</sup> | P<br>Value | All<br>(n=216)                             | EVT<br>(n=108) | SMT<br>(n=108) | P<br>Value          |
| Primary outcomes, n/total n (%)   |                             |                |                |                                  |            |                                      |            |                                            |                |                |                     |
| 90d mRS, median (IQR)             | 6 (4–6)                     | 6 (4–6)        | 6 (6–6)        | 3.48 (2.08–5.83) <sup>a</sup>    | <0.001     | 3.44 (2.05–5.78) <sup>a</sup>        | <0.001     | 6 (5–6)                                    | 6 (5–6)        | 6 (6–6)        | 0.001 <sup>a</sup>  |
| Secondary outcomes, n/total n (%) |                             |                |                |                                  |            |                                      |            |                                            |                |                |                     |
| 90d mRS                           |                             |                |                |                                  |            |                                      |            |                                            |                |                |                     |
| Excellent outcomes                | 53 (9.8)                    | 50 (11.6)      | 3 (2.7)        | 4.72 (1.45–15.44) <sup>b</sup>   | 0.01       | 3.20 (0.89–11.57)                    | 0.08       | 10 (4.6)                                   | 7 (6.5)        | 3 (2.8)        | 0.20 <sup>c</sup>   |
| Functional independence           | 77 (14.2)                   | 74 (17.2)      | 3 (2.7)        | 7.46 (2.31–24.14) <sup>b</sup>   | 0.001      | 5.55 (1.59–19.38)                    | 0.007      | 13 (6.0)                                   | 10 (9.3)       | 3 (2.8)        | 0.05 <sup>c</sup>   |
| Favorable outcomes                | 98 (18.1)                   | 93 (21.6)      | 5 (4.5)        | 5.83 (2.31–14.72) <sup>b</sup>   | <0.001     | 4.52 (1.64–12.43)                    | 0.004      | 18 (8.3)                                   | 13 (12.0)      | 5 (4.6)        | 0.05 <sup>c</sup>   |
| 90d Mortality                     | 330 (60.9)                  | 239 (55.5)     | 91 (82)        | 0.27 (0.16–0.46) <sup>b</sup>    | <0.001     | 0.27 (0.15–0.50)                     | <0.001     | 156 (72.2)                                 | 67 (62.0)      | 89 (82.4)      | 0.001 <sup>c</sup>  |
| sICH                              | 41 (7.7)                    | 40 (9.5)       | 1 (0.9)        | 11.55 (1.57–84.96) <sup>b</sup>  | 0.02       | 10.26 (1.34–78.62)                   | 0.03       | 10 (4.7)                                   | 9 (8.7)        | 1 (0.9)        | 0.008 <sup>c</sup>  |
| Any ICH                           | 66 (12.2)                   | 65 (15.1)      | 1 (0.9)        | 19.54 (2.68–142.41) <sup>b</sup> | 0.003      | 17.04 (2.28–127.55)                  | 0.006      | 12 (5.7)                                   | 11 (10.6)      | 1 (0.9)        | 0.002 <sup>c</sup>  |
| Recanalization                    | 350 (64.6)                  | 341 (79.1)     | 9 (8.1)        | 42.94 (20.90–88.22) <sup>b</sup> | <0.001     | 45.60 (21.21–102.36)                 | <0.001     | 94 (43.5)                                  | 86 (79.6)      | 8 (7.4)        | <0.001 <sup>c</sup> |

<sup>a</sup> P value obtained using univariate ordinal logistic regression.

<sup>b</sup> The odds ratios were estimated from a binary logistic regression model.

<sup>c</sup> P value obtained using the Pearson test.

Abbreviations: ABAO, acute basilar artery occlusion; IQR, interquartile; OR, odds ratio; CI, confidence interval; EVT, endovascular treatment; SMT, standard medical treatment; sICH, symptomatic intracranial hemorrhage.

**eTable 2.** Multivariate Analysis of Estimators of Outcomes

| Variables              | Unadjusted OR (95% CI) | P Value | Adjusted OR <sup>a</sup> (95% CI) | P Value |
|------------------------|------------------------|---------|-----------------------------------|---------|
| Favorable outcome      |                        |         |                                   |         |
| Age (Per 10 units)     | 0.91 (0.86–1.09)       | 0.31    | 0.95 (0.75–1.19)                  | 0.63    |
| SBP (Per 10 units)     | 0.93 (0.85–1.01)       | 0.09    | 0.91 (0.81–1.01)                  | 0.07    |
| Baseline NIHSS         | 0.90 (0.86–0.94)       | <0.001  | 0.90 (0.85–0.95)                  | <0.001  |
| Body temperature       | 0.37 (0.22–0.63)       | <0.001  | 0.45 (0.24–0.83)                  | 0.01    |
| PC-CS score            | 1.20 (1.07–1.35)       | 0.002   | 1.09 (0.87–1.36)                  | 0.46    |
| pc-ASPECTS score       | 1.70 (1.45–2.00)       | <0.001  | 1.69 (1.41–2.04)                  | <0.001  |
| BATMAN score           | 1.19 (1.06–1.34)       | 0.002   | 1.13 (0.92–1.40)                  | 0.25    |
| Occlusion sites        |                        |         |                                   |         |
| Distal BA <sup>b</sup> | 1 [Reference]          | NA      | 1 [Reference]                     | NA      |
| Middle BA              | 0.39 (0.22–0.68)       | 0.001   | 0.34 (0.17–0.72)                  | 0.004   |
| Proximal BA            | 0.59 (0.30–1.16)       | 0.13    | 0.50 (0.21–1.22)                  | 0.13    |
| VA-V4                  | 0.46 (0.24–0.60)       | 0.02    | 0.43 (0.18–1.03)                  | 0.06    |
| IVT                    | 0.89 (0.53–1.50)       | 0.66    | 0.96 (0.52–1.77)                  | 0.89    |
| EVT                    | 5.83 (2.31–14.73)      | <0.001  | 3.80 (1.36–10.58)                 | 0.01    |
| Mortality              |                        |         |                                   |         |
| Age (Per 10 units)     | 1.20 (1.03–1.39)       | 0.02    | 1.15 (0.95–1.38)                  | 0.15    |
| SBP (Per 10 units)     | 1.09 (1.02–1.17)       | 0.02    | 1.10 (1.01–1.19)                  | 0.03    |
| Body temperature       | 1.83 (1.33–2.52)       | <0.001  | 1.53 (1.06–2.22)                  | 0.03    |
| Baseline NIHSS         | 1.13 (1.09–1.18)       | <0.001  | 1.12 (1.08–1.17)                  | <0.001  |
| PC-CS score            | 0.85 (0.78–0.94)       | 0.001   | 0.91 (0.77–1.08)                  | 0.28    |
| pc-ASPECTS score       | 0.73 (0.65–0.81)       | <0.001  | 0.76 (0.67–0.85)                  | <0.001  |
| BATMAN score           | 0.84 (0.77–0.92)       | <0.001  | 0.90 (0.77–1.06)                  | 0.22    |
| IVT                    | 0.93 (0.62–1.39)       | 0.72    | 0.79 (0.49–1.27)                  | 0.34    |
| EVT                    | 0.27 (0.16–0.46)       | <0.001  | 0.29 (0.16–0.54)                  | <0.001  |

<sup>a</sup> Adjusted estimates of effect were calculated using multiple regression taking the following variables into account: age, sex, EVT, SBP, smoking, Atrial fibrillation, baseline NIHSS score, PC-CS score, baseline pc-ASPECTS score, BATMAN score, stroke etiology, occlusion site, intravenous thrombolysis, and OTT.

<sup>b</sup> Distal basilar artery was taken as reference.

Abbreviations: ABAO, acute basilar artery occlusion, OR, odds ratio; CI, confidence interval; NIHSS, National Institutes of Health Stroke Scale; SBP, systolic blood pressure; pc-ASPECTS, posterior circulation-Alberta Stroke Program Early CT Score; PC-CS, posterior circulation collateral score; BATMAN, basilar artery on Tomography Angiography; EVT, endovascular treatment; OTT, onset-treatment time; BA, basilar artery; VA-V4, vertebral artery V4 segment.

Age OR (per 1-year increase in age)

NIHSS, PC-CS, pc-ASPECTS, BATMAN OR (per 1-point increase in NIHSS, PC-CS, pc-ASPECTS, BATMAN)

Body temperature OR (per 1-degree increase in Body temperature)

IVT OR (IVT vs no IVT)



Recanalization OR (Recanalization vs no Recanalization)

**eTable 3.** Comparison of Patients With Favorable vs Poor Outcomes

| Characteristic                                 | All patients, No. (%) (n=542) | Favorable outcome, No. (%) (n=98) | Poor outcome, No. (%) (n=444) | P value |
|------------------------------------------------|-------------------------------|-----------------------------------|-------------------------------|---------|
| Age (years), median (IQR)                      | 65 (57–74)                    | 64 (55–72.25)                     | 65 (58–74)                    | 0.32    |
| Sex (men), n (%)                               | 395 (72.9)                    | 68 (69.4)                         | 327 (73.6)                    | 0.39    |
| Baseline NIHSS, median (IQR)                   | 30 (27–35)                    | 28 (24–32)                        | 32 (28–35)                    | <0.001  |
| pc-ASPECTS baseline, median (IQR) <sup>a</sup> | 8 (6–9)                       | 9 (8–10)                          | 7 (6–8)                       | <0.001  |
| pc-CS score, median (IQR)                      | 4 (3–6)                       | 5 (4–6)                           | 4 (2–5)                       | 0.001   |
| BATMAN, median (IQR)                           | 4 (2–5)                       | 4 (3–5.25)                        | 3 (2–5)                       | 0.001   |
| Body temperature, median (IQR) <sup>b</sup>    | 36.7 (36.5–36.9)              | 36.5 (36.3–36.7)                  | 36.6 (36.5–36.9)              | <0.001  |
| SBP, mean (SD) <sup>c</sup> , mm Hg            | 153 (25.7)                    | 149 (23.9)                        | 151 (26.0)                    | 0.08    |
| DBP, mean (SD) <sup>c</sup> , mm Hg            | 86 (15.6)                     | 85 (15.2)                         | 85 (15.6)                     | 0.42    |
| Vascular risk factor, n (%)                    |                               |                                   |                               |         |
| Smoking current/past                           | 179(33.0)                     | 38(38.8)                          | 141(31.8)                     | 0.18    |
| Hypertension                                   | 388(71.6)                     | 71(72.4)                          | 317(71.4)                     | 0.84    |
| Hyperlipidemia                                 | 173(31.9)                     | 30(30.6)                          | 143(32.2)                     | 0.76    |
| Diabetes mellitus                              | 128(23.6)                     | 16(16.3)                          | 112(25.2)                     | 0.06    |
| Drinking                                       | 123(22.7)                     | 28(28.6)                          | 95(21.4)                      | 0.13    |
| Medical history, n (%)                         |                               |                                   |                               |         |
| Atrial fibrillation                            | 120(22.1)                     | 26(26.5)                          | 94(21.2)                      | 0.25    |
| Coronary artery disease/prior MI               | 103(19.0)                     | 19(19.4)                          | 84(18.9)                      | 0.92    |
| Heart failure                                  | 19(3.5)                       | 5(5.1)                            | 14(3.2)                       | 0.34    |
| Prodrome                                       | 252(46.5)                     | 48(49)                            | 204(45.9)                     | 0.59    |
| Cerebral infarction                            | 134(24.7)                     | 19(19.4)                          | 115(25.9)                     | 0.18    |
| Intracerebral hemorrhage                       | 10(1.8)                       | 1(1.0)                            | 9(2.0)                        | 0.50    |
| Chronic bronchitis                             | 8(1.5)                        | 0(0)                              | 8(1.8)                        | 0.18    |
| Stroke etiology, n (%)                         |                               |                                   |                               | 0.61    |
| LAA                                            | 339(62.5)                     | 56(57.1)                          | 283(63.7)                     |         |
| CE                                             | 143(26.4)                     | 31(31.6)                          | 112(25.2)                     |         |
| Other causes                                   | 60(11.1)                      | 11(11.2)                          | 49(11.0)                      |         |
| Occlusion sites, n (%)                         |                               |                                   |                               | 0.003   |
| Distal BA                                      | 188(34.7)                     | 47(48.0)                          | 141(31.8)                     |         |
| Middle BA                                      | 175(32.3)                     | 21(21.4)                          | 154(34.7)                     |         |
| Proximal BA                                    | 76(14.0)                      | 13(13.3)                          | 63(14.2)                      |         |
| VA-V4                                          | 103(19.0)                     | 17(17.3)                          | 86(19.4)                      |         |
| intravenous thrombolysis, n (%)                | 131(24.2)                     | 22(22.4)                          | 109(24.5)                     | 0.66    |
| OTT, median (IQR), min                         | 311(141–402)                  | 227.5(129.75–329)                 | 251(141–413)                  | 0.18    |
| Successful recanalization, n (%)               | 350(64.6)                     | 91(92.9)                          | 259(58.3)                     | <0.001  |

<sup>a</sup> Data were missing for 4 patients in the EVT cohort and 2 patients in the SMT alone cohort.

<sup>b</sup> Data were missing for 6 patients in the EVT cohort and 1 patient in the SMT alone cohort.

<sup>c</sup> Data were missing for 2 patients in the EVT cohort.

Abbreviations: BAO, basilar artery occlusion; IQR, interquartile; SD, standard deviation; NIHSS, National Institutes of Health Stroke Scale; pc-ASPECTS, posterior circulation-Alberta Stroke Program Early CT Score; PC-CS, posterior circulation collateral score; BATMAN, basilar artery on Tomography Angiography; SBP, systolic blood pressure; DBP, diastolic blood pressure; MI, myocardial infarction; OTT, onset-treatment time; BA, basilar artery; VA-V4, vertebral artery V4 segment; LAA, Large artery atherosclerosis; CE, Cardioembolism.

**eTable 4.** Baseline Characteristics of Patients with Endovascular Therapy

| Characteristic                            | All patients,<br>No. (%)<br>(n=647) | NIHSS $\geq$ 21, No.<br>(%) (n=431) | NIHSS 10~20,<br>No. (%)<br>(n=147) | NIHSS <10, No.<br>(%) (n=69) | P<br>value |
|-------------------------------------------|-------------------------------------|-------------------------------------|------------------------------------|------------------------------|------------|
| Age (years), median (IQR)                 | 64 (56–73)                          | 65 (57–74)                          | 63 (55–73)                         | 64 (57–69)                   | 0.25       |
| Sex, n (%)                                |                                     |                                     |                                    |                              | 0.77       |
| Women                                     | 164 (25.3)                          | 111(25.8)                           | 38 (25.9)                          | 15 (21.7)                    |            |
| Men                                       | 483 (74.7%)                         | 320 (74.2%)                         | 109 (74.1%)                        | 54 (78.3%)                   |            |
| Baseline NIHSS, median (IQR) <sup>a</sup> | 27 (17–33)                          | 31 (27–35)                          | 15 (14–18)                         | 6 (5–8)                      | <0.001     |
| pc-ASPECTS, median (IQR)                  | 8 (7–9)                             | 8 (6–9)                             | 8 (7–10)                           | 8 (7–10)                     | <0.001     |
| pc-CS score, median (IQR)                 | 4 (3–6)                             | 4 (3–5)                             | 6 (4–7)                            | 5 (4–7)                      | <0.001     |
| BATMAN, median (IQR)                      | 4 (2–6)                             | 3 (2–5)                             | 5 (4–6)                            | 5 (4–6)                      | <0.001     |
| SBP, mean (SD) <sup>b</sup> , mm Hg       | 150 (26)                            | 150 (26)                            | 150 (25)                           | 149 (24)                     | 0.93       |
| DBP, mean (SD) <sup>b</sup> , mm Hg       | 85 (16)                             | 85 (16)                             | 86 (15)                            | 84 (15)                      | 0.10       |
| Vascular risk factor, n (%)               |                                     |                                     |                                    |                              |            |
| Smoking current/past                      | 235 (36.3%)                         | 160 (37.1%)                         | 42 (28.6%)                         | 33(47.8%)                    | 0.02       |
| Hypertension                              | 451 (69.7%)                         | 308 (71.5%)                         | 100 (68.0%)                        | 43 (62.3%)                   | 0.27       |
| Hyperlipidemia                            | 214 (33.1%)                         | 133 (30.9)                          | 55 (37.4)                          | 26 (37.7%)                   | 0.24       |
| Diabetes mellitus                         | 149 (23.0%)                         | 103 (23.9%)                         | 34 (23.9%)                         | 12 (17.4%)                   | 0.49       |
| Drinking                                  | 141 (21.8%)                         | 102 (23.7%)                         | 21 (14.3%)                         | 18 (26.1%)                   | 0.04       |
| Medical history, n (%)                    |                                     |                                     |                                    |                              |            |
| Atrial fibrillation                       | 136 (21.0%)                         | 104 (24.1%)                         | 21 (14.3%)                         | 11 (15.9%)                   | 0.02       |
| Coronary artery disease                   | 105 (16.2%)                         | 87 (20.2%)                          | 11 (7.5%)                          | 7 (10.1%)                    | 0.001      |
| Heart failure <sup>c</sup>                | 22 (3.4%)                           | 17 (3.9%)                           | 4 (2.7%)                           | 1 (1.4%)                     | 0.67       |
| Prodrome                                  | 302 (46.7%)                         | 197 (45.7%)                         | 68 (46.3%)                         | 37 (53.6%)                   | 0.47       |
| Cerebral infarction                       | 140 (21.6%)                         | 101 (23.4%)                         | 29 (19.7%)                         | 10 (14.5%)                   | 0.20       |
| Intracerebral hemorrhage <sup>c</sup>     | 12 (1.9%)                           | 8 (1.9%)                            | 4 (2.7%)                           | 0 (0)                        | 0.43       |
| Chronic bronchitis <sup>c</sup>           | 13 (2.0%)                           | 8 (1.9%)                            | 3 (2.0%)                           | 2 (2.9%)                     | 0.75       |
| Cause of stroke, n (%)                    |                                     |                                     |                                    |                              | 0.19       |
| LAA                                       | 418 (64.6%)                         | 268 (762.2%)                        | 101 (68.7%)                        | 49 (71.0%)                   |            |
| CE                                        | 173 (26.7%)                         | 123 (28.5%)                         | 32 (21.8%)                         | 18 (26.1%)                   |            |
| Other causes                              | 56 (8.7%)                           | 40 (9.3%)                           | 14 (9.5%)                          | 2 (2.9%)                     |            |
| Occlusion sites, n (%)                    |                                     |                                     |                                    |                              | 0.08       |
| Distal BA                                 | 222 (34.3%)                         | 164 (38.1%)                         | 36 (24.5%)                         | 22 (31.9%)                   |            |
| Middle BA                                 | 195 (30.1%)                         | 117 (27.1%)                         | 56 (38.1%)                         | 22 (31.9%)                   |            |
| Proximal BA                               | 107 (16.5%)                         | 70 (16.2%)                          | 27 (18.4%)                         | 10 (14.5%)                   |            |
| VA-V4                                     | 123 (19.0%)                         | 80 (18.6%)                          | 28 (19.0%)                         | 15 (21.7%)                   |            |
| intravenous thrombolysis, n (%)           | 119 (18.4%)                         | 82 (19.0%)                          | 30 (20.4%)                         | 7 (10.1%)                    | 0.16       |
| OTT, median (IQR), min                    | 246 (132–390)                       | 247 (144–401)                       | 215 (112–341)                      | 293 (89–420)                 | 0.21       |
| OTP, median (IQR), min                    | 328 (220–493)                       | 325 (223–495)                       | 310 (203–475)                      | 351 (265–618)                | 0.006      |
| OTR, median (IQR), min                    | 441 (328–626)                       | 436 (328–623)                       | 432 (320–613)                      | 470 (345–749)                | 0.007      |

|                                  |               |               |               |               |        |
|----------------------------------|---------------|---------------|---------------|---------------|--------|
| PTR, median (IQR), min           | 105 (71–151)  | 104 (72–146)  | 109 (72–169)  | 103 (66–166)  | 0.13   |
| DTP, median (IQR), min           | 131 (88–200)  | 125 (83–180)  | 142 (94–215)  | 155 (108–280) | <0.001 |
| DTR, median (IQR), min           | 247 (186–345) | 234 (180–319) | 265 (195–387) | 300 (194–425) | <0.001 |
| General anesthesia, n (%)        | 257 (39.7%)   | 194 (45.0%)   | 50 (34.0%)    | 13 (18.8%)    | <0.001 |
| Successful recanalization, n (%) | 522 (80.7%)   | 341 (79.1%)   | 119 (81.0%)   | 62 (89.9%)    | 0.11   |

<sup>a</sup> Data were missing for 4 patients in the EVT cohort.

<sup>b</sup> Data were missing for 2 patients in the EVT cohort.

<sup>c</sup> Fisher exact test.

Abbreviations: ABAO, acute basilar artery occlusion; IQR, interquartile; SD, standard deviation; NIHSS, National Institutes of Health Stroke Scale; pc-ASPECTS, posterior circulation-Alberta Stroke Program Early CT Score; PC-CS, posterior circulation collateral score; BATMAN, basilar artery on Tomography Angiography; SBP, systolic blood pressure; DBP, diastolic blood pressure; MI, myocardial infarction; OTT, onset-treatment time; BA, basilar artery; VA-V4, vertebral artery V4 segment; LAA, Large artery atherosclerosis; CE, Cardioembolism.

**Table 5.** Multivariate Analysis of Estimators of Outcomes After Endovascular Therapy

| Variables                      | Functional outcome                   |         | Mortality                            |         |
|--------------------------------|--------------------------------------|---------|--------------------------------------|---------|
|                                | Adjusted OR <sup>a</sup><br>(95% CI) | p-value | Adjusted OR <sup>a</sup><br>(95% CI) | p-value |
| Dichotomized baseline NIHSS    | 0.29 (0.19–0.46)                     | <0.001  | 2.67 (1.74–4.10)                     | <0.001  |
| Age (Per 10 units)             | 0.88 (0.73–1.06)                     | 0.18    | 1.18 (0.99–1.41)                     | 0.06    |
| PC-CS score (Per 1-point)      | 1.03 (0.87–1.22)                     | 0.71    | 0.94 (0.81–1.10)                     | 0.44    |
| pc-ASPECTS score (Per 1-point) | 1.67 (1.44–1.92)                     | <0.001  | 0.74 (0.65–0.83)                     | <0.001  |
| BATMAN score (Per 1-point)     | 1.17 (1.00–1.38)                     | 0.06    | 0.92 (0.79–1.06)                     | 0.24    |
| Smoking                        | 1.40 (0.87–2.23)                     | 0.16    | 0.87 (0.57–1.33)                     | 0.51    |
| SBP (Per 10 units)             | 0.92 (0.85–1.00)                     | 0.05    | 1.10 (1.02–1.19)                     | 0.01    |
| Atrial fibrillation            | 0.85 (0.37–1.95)                     | 0.69    | 0.84 (0.38–1.84)                     | 0.66    |
| Intravenous thrombolysis       | 0.85 (0.52–1.40)                     | 0.53    | 0.91 (0.58–1.43)                     | 0.69    |
| Cause of stroke                |                                      |         |                                      |         |
| LAA <sup>b</sup>               | 1 [Reference]                        | NA      | [1 Reference]                        | NA      |
| CE                             | 1.07 (0.48–2.38)                     | 0.88    | 1.32 (0.62–2.84)                     | 0.47    |
| Other causes                   | 1.16 (0.54–2.49)                     | 0.71    | 0.63 (0.30–1.35)                     | 0.24    |
| Occlusion sites                | reference                            | 0.007   | reference                            | 0.69    |
| Distal BA <sup>c</sup>         |                                      |         |                                      |         |
| Middle BA                      | 0.38 (0.22–0.68)                     | 0.001   | 1.17 (0.69–2.00)                     | 0.56    |
| Proximal BA                    | 0.66 (0.34–1.29)                     | 0.22    | 0.92 (0.48–1.77)                     | 0.79    |
| VA-V4                          | 0.45 (0.23–0.87)                     | 0.02    | 1.28 (0.70–2.33)                     | 0.43    |
| Successful recanalization      | 4.71 (2.41–9.21)                     | <0.001  | 0.14 (0.08–0.24)                     | <0.001  |

<sup>a</sup> Adjusted estimates of effect were calculated using multiple regression taking the following variables into account: age, sex, SBP, smoking, Atrial fibrillation, baseline NIHSS score, PC-CS score, baseline pc-ASPECTS score, BATMAN score, stroke etiology, occlusion site, intravenous thrombolysis, and OTT.

<sup>b</sup> LAA was taken as reference.

<sup>c</sup> Distal BA was taken as reference.

Abbreviations: OR, odds ratio; CI, confidence interval; NIHSS, National Institutes of Health Stroke Scale; SBP, systolic blood pressure; pc-ASPECTS, posterior circulation-Alberta Stroke Program Early CT Score; PC-CS, posterior circulation collateral score; BATMAN, basilar artery on Tomography Angiography; EVT, endovascular treatment; OTT, onset-treatment time; BA, basilar artery; VA, vertebral artery V4 segment; LAA, Large artery atherosclerosis; CE, Cardioembolism.

**eFigure 1.** Flowchart

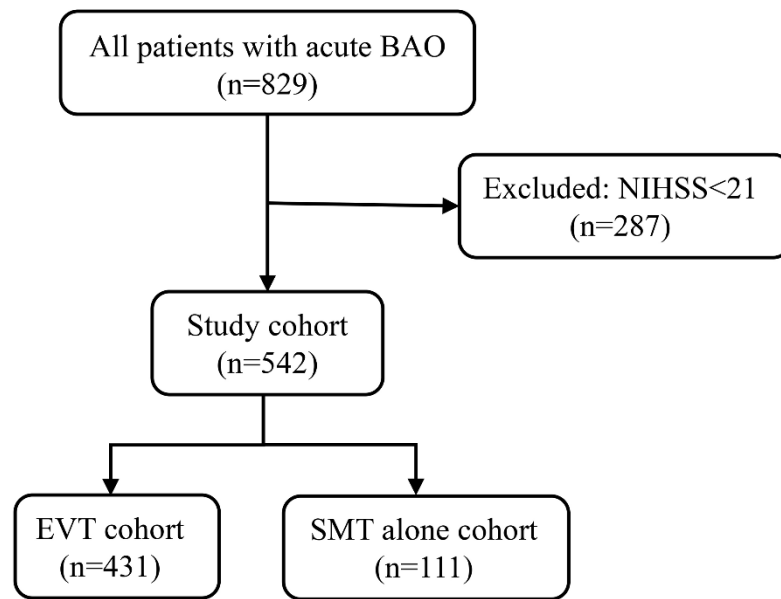

This figure shows the enrollment information of patients in the present study.

BAO, basilar artery occlusion; NIHSS, National Institutes of Health Stroke Scale; EVT, endovascular therapy; SMT, standard medical treatment.

**eFigure 2.** Association of Baseline National Institutes of Health Stroke Scale Score With Probability of Favorable Outcome

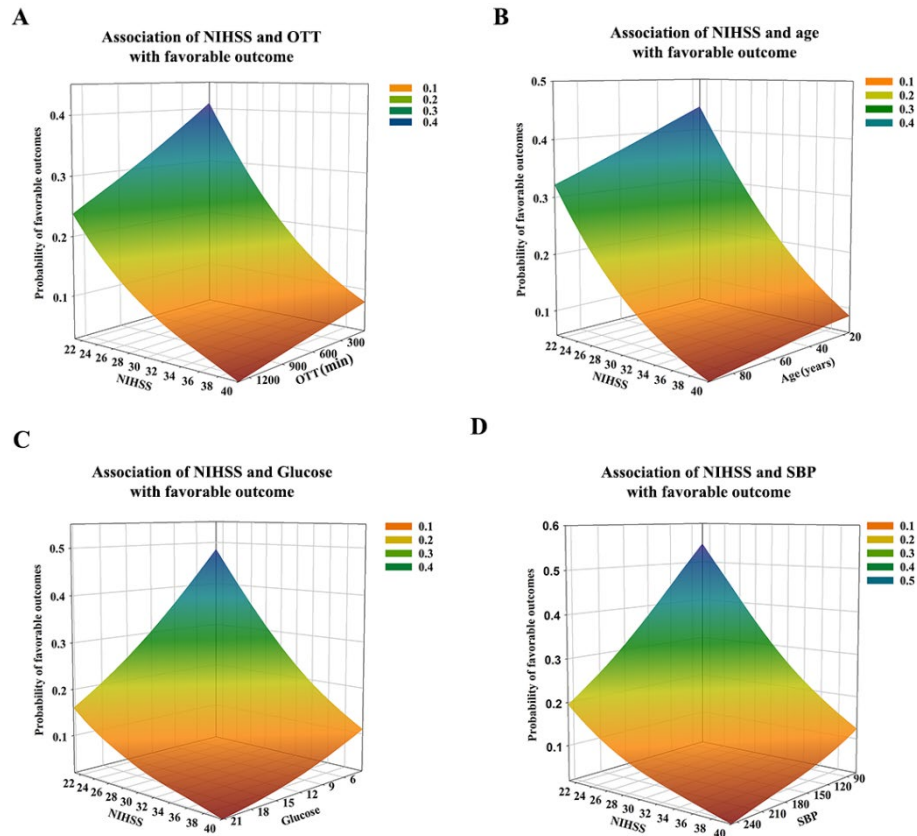

Association between baseline NIHSS and OTT (A), age (B), glucose (C) and SBP (D) with the probability of mortality at 90 days after EVT in the severe ABAO. The probability of favorable outcome is associated with baseline NIHSS score. There is a decrease in the likelihood of favorable outcomes with the baseline NIHSS progresses while the outcome probability is roughly stable over the onset to treatment time (OTT), age, glucose and SBP. SBP, systolic Blood Pressure.



**eFigure 3.** Estimated Marginal Effects of Favorable Outcome Probabilities on Onset to Puncture (OTP) Time and Puncture to Recanalization (PTR) Time

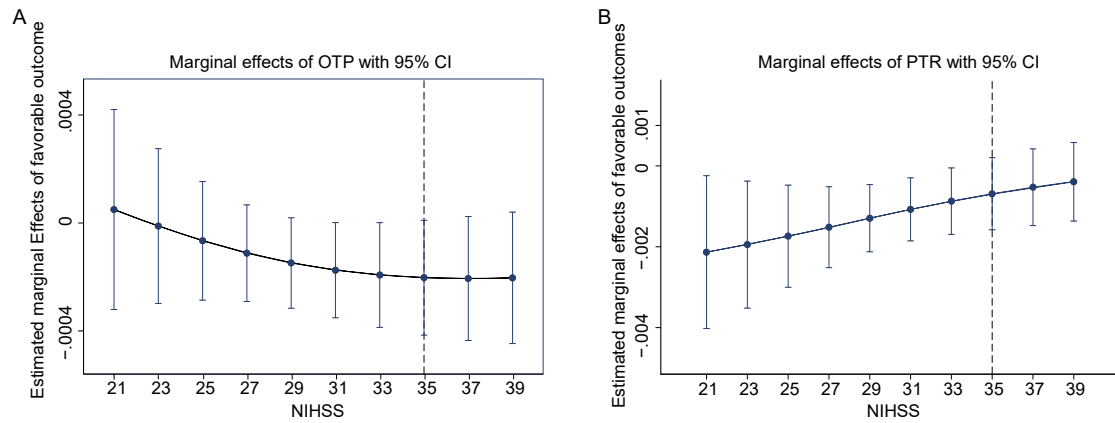

The estimated marginal effects of favorable outcome probabilities on onset to puncture (OTP) time (A) and puncture to recanalization (PTR) time (B) with increases of the baseline NIHSS in EVT group.

**eFigure 4.** Association of Baseline National Institutes of Health Stroke Scale Score With Probability of Clinical Outcomes With Endovascular Therapy

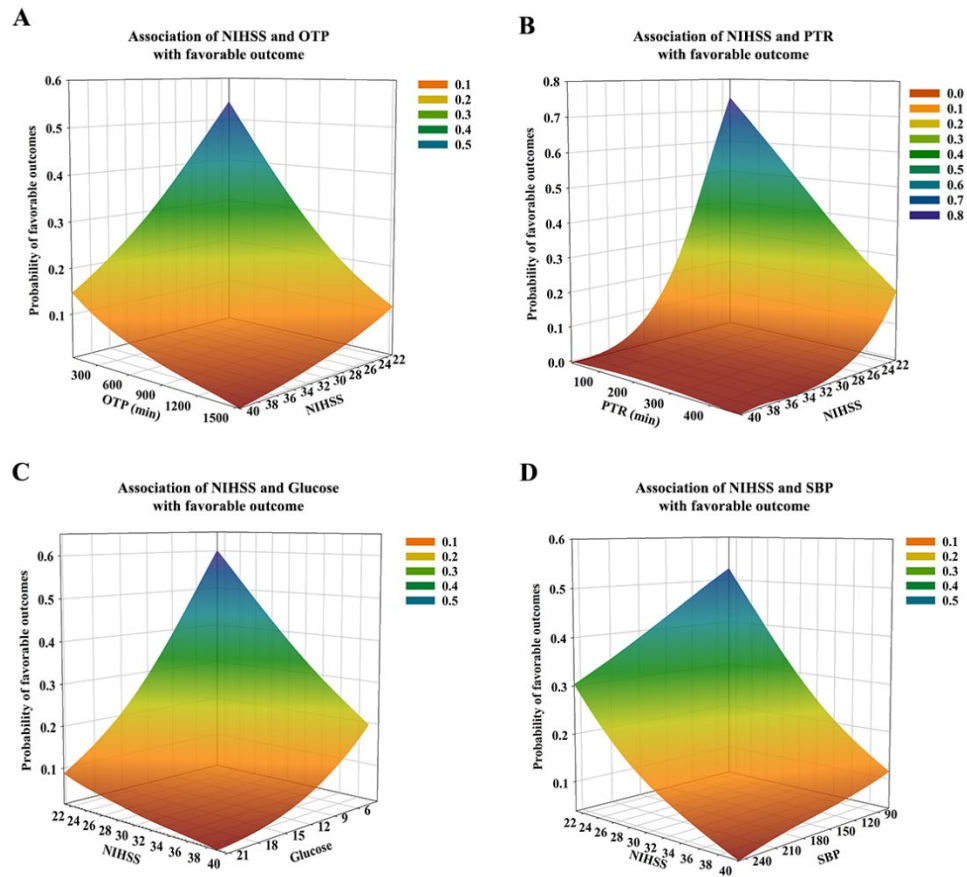

Association between baseline NIHSS and OTP (A), PTR (B), glucose (C), and SBP (D) with the probability of favorable outcomes at 90 days after EVT in the severe ABAO. The probability of favorable outcome is associated with baseline NIHSS score. There is a decrease in the likelihood of a favorable outcome with increase in the baseline NIHSS score while the outcome probability is roughly stable over the onset to puncture (OTP) time, puncture to recanalization (PTR) time, glucose and systolic blood pressure (SBP).
